# Supplementary material for: Effects of the Quinone Oxidoreductase WrbA on Escherichia coli Biofilm Formation and Oxidative Stress
Source: MDPI journal article supplement (doi:10.3390/antiox10060919), 2021-06-06
Supplement: s1 [file s1]

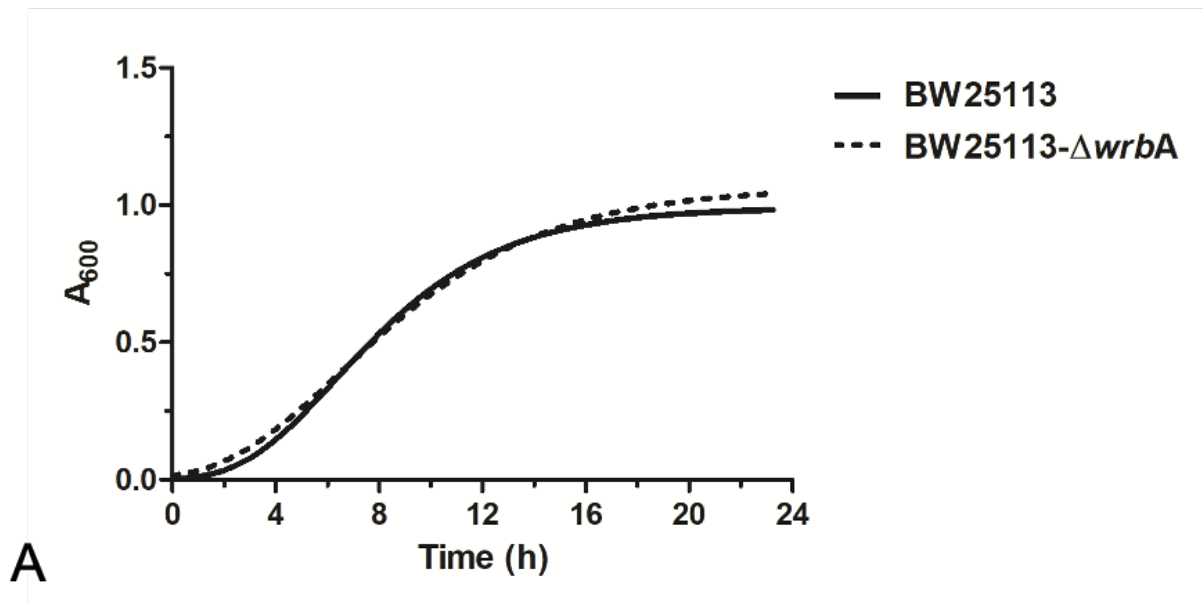

|                         | BW25113           | BW25113- $\Delta wrbA$ |
|-------------------------|-------------------|------------------------|
| $\lambda$ (h)           | 2.75 $\pm$ 0.27   | 2.13 $\pm$ 0.48        |
| $\mu_m$ ( $A_{600}/h$ ) | 0.10 $\pm$ 0.003  | 0.09 $\pm$ 0.01        |
| $Y_M$ ( $A_{600}$ )     | 0.99 $\pm$ 0.03   | 1.07 $\pm$ 0.01        |
| $R^2$                   | 0.997 $\pm$ 0.001 | 0.997 $\pm$ 0.001      |

**B**

**Supplementary Figure S1.** BW25113 and BW25113- $\Delta wrbA$  planktonic growth. Panel A displays  $A_{600}$ -based growth curves, whereas panel B, the growth parameters of lag phase duration ( $\lambda$ ), maximum specific growth rate ( $\mu_m$ ), maximum growth ( $Y_M$ ) and the Goodness of Fit ( $R^2$ ) obtained by the Gompertz model. Data represent the mean  $\pm$  standard deviation of three independent measurements. No statistical differences were found among the strains.
