# Supplementary material for: Effects of the Quinone Oxidoreductase WrbA on Escherichia coli Biofilm Formation and Oxidative Stress
Source: MDPI journal article supplement (doi:10.3390/antiox10060919), 2021-06-06
Supplement: s1 [file s1]

## PLANKTONIC GROWTH CURVES

[illegible]

| BUIOFILM GROWTH CURVES |      |          |          |             |  |      |         |           |
|------------------------|------|----------|----------|-------------|--|------|---------|-----------|
| BW25113                |      |          |          |             |  |      |         |           |
|                        | time | CFU/cm2  | N/N0     | log10(N/N0) |  | time | avarage | stand dev |
| replicate 1            | 0    | 2,17E+08 | 1,00E+00 | 0           |  | 0    | 0,00    | 0,00      |
| replicate 2            | 0    | 2,17E+08 | 1,00E+00 | 0,00        |  | 5    | 0,86    | 0,06      |
| replicate 3            | 0    | 1,68E+08 | 7,75E-01 | -0,11       |  | 12   | 2,10    | 0,13      |
| replicate 1            | 5    | 1,63E+09 | 7,51E+00 | 0,88        |  | 18   | 2,34    | 0,70      |
| replicate 2            | 5    | 1,83E+09 | 8,45E+00 | 0,93        |  | 24   | 2,47    | 0,04      |
| replicate 3            | 5    | 1,29E+09 | 5,95E+00 | 0,77        |  | 36   | 3,07    | 0,11      |
| replicate 1            | 12   | 1,79E+10 | 8,26E+01 | 1,92        |  | 48   | 3,96    | 0,03      |
| replicate 2            | 12   | 3,37E+10 | 1,55E+02 | 2,19        |  | 60   | 8,86    | 0,16      |
| replicate 3            | 12   | 3,42E+10 | 1,58E+02 | 2,20        |  | 72   | 9,76    | 0,03      |
| replicate 1            | 18   | 1,46E+10 | 6,72E+01 | 1,83        |  |      |         |           |
| replicate 2            | 18   | 1,60E+10 | 7,36E+01 | 1,87        |  |      |         |           |
| replicate 3            | 18   | 4,64E+11 | 2,14E+03 | 3,33        |  |      |         |           |
| replicate 1            | 24   | 6,52E+10 | 3,00E+02 | 2,48        |  |      |         |           |
| replicate 2            | 24   | 5,64E+10 | 2,60E+02 | 2,41        |  |      |         |           |
| replicate 3            | 24   | 6,97E+10 | 3,21E+02 | 2,51        |  |      |         |           |
| replicate 1            | 36   | 1,83E+11 | 8,42E+02 | 2,93        |  |      |         |           |
| replicate 2            | 36   | 3,19E+11 | 1,47E+03 | 3,17        |  |      |         |           |
| replicate 3            | 36   | 2,93E+11 | 1,35E+03 | 3,13        |  |      |         |           |
| replicate 1            | 48   | 1,90E+12 | 8,76E+03 | 3,94        |  |      |         |           |
| replicate 2            | 48   | 2,21E+12 | 1,02E+04 | 4,01        |  |      |         |           |
| replicate 3            | 48   | 1,90E+12 | 8,76E+03 | 3,94        |  |      |         |           |
| replicate 1            | 60   | 2,28E+17 | 1,05E+09 | 9,02        |  |      |         |           |
| replicate 2            | 60   | 1,08E+17 | 5,00E+08 | 8,70        |  |      |         |           |
| replicate 1            | 72   | 1,15E+18 | 5,31E+09 | 9,72        |  |      |         |           |
| replicate 2            | 72   | 1,36E+18 | 6,28E+09 | 9,80        |  |      |         |           |
| replicate 3            | 72   | 1,22E+18 | 5,63E+09 | 9,75        |  |      |         |           |
|                        |      |          |          |             |  |      |         |           |
|                        |      |          |          |             |  |      |         |           |
| BW25113-Δwrb A         |      |          |          |             |  |      |         |           |
|                        | time | CFU/cm2  | N/N0     | log10(N/N0) |  | time | avarage | stand dev |
| replicate 1            | 0    | 9,37E+07 | 1,00E+00 | 0,00        |  | 0    | -0,03   | 0,03      |
| replicate 2            | 0    | 8,06E+07 | 8,60E-01 | -0,07       |  | 5    | 1,20    | 0,09      |
| replicate 3            | 0    | 1,61E+08 | 1,72E+00 | 0,23        |  | 12   | 3,79    | 0,08      |
| replicate 1            | 5    | 1,22E+09 | 1,30E+01 | 1,11        |  | 18   | 6,24    | 0,04      |
| replicate 2            | 5    | 1,98E+09 | 2,11E+01 | 1,32        |  | 24   | 5,07    | 0,08      |
| replicate 3            | 5    | 1,40E+09 | 1,49E+01 | 1,17        |  | 36   | 5,85    | 0,00      |
| replicate 1            | 12   | 4,77E+11 | 5,09E+03 | 3,71        |  | 48   | 6,33    | 0,00      |
| replicate 2            | 12   | 6,91E+11 | 7,38E+03 | 3,87        |  | 60   | 7,51    | 0,13      |
| replicate 3            | 12   |          |          |             |  | 72   | 7,71    | 0,04      |
| replicate 1            | 18   | 1,71E+14 | 1,83E+06 | 6,26        |  |      |         |           |
| replicate 2            | 18   | 1,43E+14 | 1,52E+06 | 6,18        |  |      |         |           |
| replicate 3            | 18   | 1,75E+14 | 1,87E+06 | 6,27        |  |      |         |           |
| replicate 1            | 24   | 1,07E+13 | 1,14E+05 | 5,06        |  |      |         |           |
| replicate 2            | 24   | 1,39E+13 | 1,48E+05 | 5,17        |  |      |         |           |
| replicate 3            | 24   | 8,83E+12 | 9,42E+04 | 4,97        |  |      |         |           |
| replicate 1            | 36   | 6,58E+13 | 7,03E+05 | 5,85        |  |      |         |           |
| replicate 2            | 36   | 6,72E+13 | 7,17E+05 | 5,86        |  |      |         |           |
| replicate 3            | 36   |          |          |             |  |      |         |           |
| replicate 1            | 48   | 2,02E+14 | 2,15E+06 | 6,33        |  |      |         |           |
| replicate 2            | 48   | 2,00E+14 | 2,13E+06 | 6,33        |  |      |         |           |
| replicate 3            | 48   |          |          |             |  |      |         |           |
| replicate 1            | 60   | 4,12E+15 | 4,40E+07 | 7,64        |  |      |         |           |
| replicate 2            | 60   | 2,24E+15 | 2,39E+07 | 7,38        |  |      |         |           |
| replicate 1            | 72   | 5,13E+15 | 5,48E+07 | 7,74        |  |      |         |           |
| replicate 2            | 72   | 5,22E+15 | 5,57E+07 | 7,75        |  |      |         |           |
| replicate 3            | 72   | 4,16E+15 | 4,43E+07 | 7,65        |  |      |         |           |

| BIOFILM THICKNESS |                   |  |                    |                   |
|-------------------|-------------------|--|--------------------|-------------------|
| BW25113 (um)      |                   |  | BW25113-ΔwrbA (um) |                   |
| replicate 1       | 228               |  | replicate 1        | 149               |
| replicate 2       | 224               |  | replicate 2        | 115               |
| replicate 3       | 247               |  | replicate 3        | 133               |
| replicate 1       | 272               |  | replicate 1        | 108               |
| replicate 2       | 245               |  | replicate 2        | 124               |
| replicate 3       | 240               |  | replicate 3        | 173               |
| replicate 1       | 288               |  | replicate 1        | 154               |
| replicate 2       | 255               |  | replicate 2        | 151               |
| replicate 3       | 321               |  | replicate 3        | 104               |
| replicate 3       | 297               |  | replicate 3        | 135               |
| avarage           | <b>261,7</b>      |  | avarage            | <b>134,6</b>      |
| st. dev           | <b>31,8470302</b> |  | st. dev            | <b>22,2870166</b> |

| OXIDATIVE STRESS                               |                    |            |            |            |
|------------------------------------------------|--------------------|------------|------------|------------|
| 48h                                            |                    |            |            |            |
| Relative fluorescence in 150ul cell suspension |                    |            |            |            |
|                                                | replicate 1        |            |            |            |
| BW25113                                        | 14185,25           | 14622,25   | 15921,25   | 15075,25   |
| BW25113-ΔwrbA                                  | 18492,25           | 18524,25   | 18737,25   | 18970,25   |
|                                                | replicate 2        |            |            |            |
|                                                | 17079,25           | 17266,25   | 16941,25   | 17325,25   |
|                                                | 11996,25           | 12041,25   | 12005,25   | 12278,25   |
|                                                | replicate 3        |            |            |            |
|                                                | 16314,25           | 17395,25   | 17345,25   | 17253,25   |
|                                                | 18698,25           | 18536,25   | 18597,25   | 20602,25   |
|                                                |                    |            |            |            |
|                                                | n. cells in 150 ul |            |            |            |
|                                                | 3,0536E+15         |            |            |            |
|                                                | 8,247E+14          |            |            |            |
|                                                |                    |            |            |            |
| Relative fluorescence/cells                    |                    |            |            |            |
|                                                | replicate 1        |            |            |            |
| BW25113                                        | 4,6455E-12         | 4,7886E-12 | 5,214E-12  | 4,9369E-12 |
| BW25113-ΔwrbA                                  | 2,2423E-11         | 2,2462E-11 | 2,272E-11  | 2,3003E-11 |
|                                                | replicate 2        |            |            |            |
|                                                | 5,5932E-12         | 5,6544E-12 | 5,548E-12  | 5,6738E-12 |
|                                                | 1,4546E-11         | 1,4601E-11 | 1,4557E-11 | 1,4888E-11 |
|                                                | replicate 3        |            |            |            |
|                                                | 5,3427E-12         | 5,6967E-12 | 5,6803E-12 | 5,6502E-12 |
|                                                | 2,2673E-11         | 2,2476E-11 | 2,255E-11  | 2,4982E-11 |
|                                                |                    |            |            |            |
|                                                | Average            | sd         | err%       |            |
|                                                | 5,3687E-12         | 3,8279E-13 | 7,13014834 |            |
|                                                | 2,0157E-11         | 4,1264E-12 | 20,4715673 |            |
|                                                |                    |            |            |            |
| 60h                                            |                    |            |            |            |
| Relative fluorescence in 150ul cell suspension |                    |            |            |            |
|                                                | replicate 1        |            |            |            |
| BW25113                                        | 19740,25           | 20068,25   | 19980,25   |            |
| BW25113-ΔwrbA                                  | 22077,25           | 21726,25   | 21589,25   | 21622,25   |
|                                                | replicate 2        |            |            |            |
|                                                | 20038,25           | 20156,25   | 20301,25   | 20271,25   |
|                                                | 20686,25           | 20681,25   | 20631,25   | 20768,25   |
|                                                | replicate 3        |            |            |            |
|                                                | 22960,25           | 22866,25   | 22889,25   | 21213,25   |
|                                                | 22537,25           | 22578,25   | 22534,25   | 21883,25   |
|                                                |                    |            |            |            |
|                                                | n. cells in 150 ul |            |            |            |
|                                                |                    |            |            |            |
|                                                | 6,5445E+15         |            |            |            |
|                                                | 7,4364E+17         |            |            |            |
|                                                |                    |            |            |            |
| Relative fluorescence/cells                    |                    |            |            |            |
|                                                | replicate 1        |            |            |            |
| BW25113                                        | 3,0163E-12         | 3,0664E-12 | 3,053E-12  |            |
| BW25113-ΔwrbA                                  | 2,9688E-14         | 2,9216E-14 | 2,9032E-14 | 2,9076E-14 |
|                                                | replicate 2        |            |            |            |
|                                                | 3,0618E-12         | 3,0799E-12 | 3,102E-12  | 3,0974E-12 |
|                                                | 2,7817E-14         | 2,7811E-14 | 2,7743E-14 | 2,7928E-14 |
|                                                | replicate 3        |            |            |            |
|                                                | 3,5083E-12         | 3,4939E-12 | 3,4975E-12 | 3,2414E-12 |
|                                                | 3,0306E-14         | 3,0362E-14 | 3,0302E-14 | 2,9427E-14 |
|                                                |                    |            |            |            |
|                                                | Average            | sd         | err%       |            |
|                                                | 3,2016E-12         | 1,9962E-13 | 6,23494873 |            |
|                                                | 2,9059E-14         | 1,021E-15  | 3,51347041 |            |

| CATALASE ACTIVITY                                |         |         |        |         |         |
|--------------------------------------------------|---------|---------|--------|---------|---------|
| BW25113 48h (catalase activity U)                |         |         |        |         |         |
|                                                  | repl. 1 | repl. 2 | repl 3 | avarage | st. dev |
| HPH                                              | 113     | 133     | 107    | 118     | 14      |
| HPI                                              | 251     | 179     | 297    | 242     | 59      |
|                                                  |         |         |        |         |         |
| BW25113 60h (catalase activity U)                |         |         |        |         |         |
|                                                  | repl. 1 | repl. 2 | repl 3 | avarage | st. dev |
| HPH                                              | 433     | 456     | 387    | 425     | 35      |
| HPI                                              | 45      | 108     | 192    | 115     | 74      |
|                                                  |         |         |        |         |         |
| BW25113- $\Delta$ wrbA 48h (catalase activity U) |         |         |        |         |         |
|                                                  | repl. 1 | repl. 2 | repl 3 | avarage | st. dev |
| HPH                                              | 283     | 324     | 272    | 293     | 27      |
| HPI                                              | 237     | 317     | 291    | 282     | 41      |
|                                                  |         |         |        |         |         |
| BW25113- $\Delta$ wrbA 60h (catalase activity U) |         |         |        |         |         |
|                                                  | repl. 1 | repl. 2 | repl 3 | avarage | st. dev |
| HPH                                              | 598     | 632     | 580    | 603     | 26      |
| HPI                                              | 121     | 164     | 250    | 178     | 66      |

| SUSCEPTIBILITY TO BIOCIDES      |             |            |            |            |
|---------------------------------|-------------|------------|------------|------------|
| BW25113 (log10 reduction)       |             |            |            |            |
|                                 | repl 1      | repl 2     | avarage    | st. dev    |
| 48h_HP                          | 0,70733357  | 0,6392018  | 0,67326768 | 0,04817644 |
| 48h_HP+GI                       | 0,68557018  | 0,5658763  | 0,62572324 | 0,08463636 |
| 48h_CBA                         | 1,16154554  | 1,70614859 | 1,43384707 | 0,38509251 |
| 48h_CBA+GI                      | 0,77579095  | 0,65259    | 0,71419047 | 0,08711623 |
| 60h_HP                          | 0,65851719  | 0,39858676 | 0,52855198 | 0,18379857 |
| 60h_HP+GI                       | 1,20011624  | 1,30623119 | 1,25317372 | 0,0750346  |
| 60h_CBA                         | 1,11367166  | 0,9431405  | 1,02840608 | 0,12058374 |
| 60h_CBA+GI                      | 0,99192237  | 0,6925549  | 0,84223864 | 0,21168477 |
|                                 |             |            |            |            |
|                                 |             |            |            |            |
| BW25113-ΔwrbA (log10 reduction) |             |            |            |            |
|                                 | replicate 1 | replicae 2 | avarage    | st. dev    |
| 48h_HP                          | 2,99323577  | 3,10389613 | 3,04856595 | 0,07824869 |
| 48h_HP+GI                       | 1,68052002  | 1,4531541  | 1,56683706 | 0,16077198 |
| 48h_CBA                         | 1,66171645  | 1,51373537 | 1,58772591 | 0,10463843 |
| 48h_CBA+GI                      | 1,3022347   | 0,96642417 | 1,13432943 | 0,2374539  |
| 60h_HP                          | 1,79034139  | 1,98871899 | 1,88953019 | 0,14027414 |
| 60h_HP+GI                       | 1,34207383  | 1,36759599 | 1,35483491 | 0,01804689 |
| 60h_CBA                         | 0,93029227  | 0,98871899 | 0,95950563 | 0,04131393 |
| 60h_CBA+GI                      | 0,95931291  | 0,88226366 | 0,92078828 | 0,05448205 |

| NADPH:p-BQ oxidoreductase activity (U/mg) of <i>E. coli</i> crude extracts |            |         |  |            |                         |
|----------------------------------------------------------------------------|------------|---------|--|------------|-------------------------|
|                                                                            | replicates | BW25113 |  | replicates | BW25113- $\Delta$ wrb A |
|                                                                            | 1_1        | 25,48   |  | 1_1        | 5,83                    |
|                                                                            | 1_2        | 25,61   |  | 1_2        | 5,45                    |
|                                                                            | 1_3        | 20,23   |  | 1_3        | 6,23                    |
|                                                                            | 1_4        | 24,92   |  | 1_4        | 7,19                    |
|                                                                            | 2_1        | 19,88   |  | 2_1        | 6,91                    |
|                                                                            | 2_2        | 21,53   |  | 2_2        | 9,22                    |
|                                                                            | 2_3        | 17,42   |  | 2_3        | 9,61                    |
|                                                                            | 3_1        | 20,40   |  | 2_4        | 11,49                   |
|                                                                            | 3_2        | 22,03   |  | 3_1        | 6,00                    |
|                                                                            | 3_3        | 23,96   |  | 3_2        | 6,38                    |
|                                                                            | 3_4        | 22,71   |  | 3_3        | 5,23                    |
|                                                                            | 3_5        | 21,67   |  | 3_4        | 5,63                    |
|                                                                            |            |         |  | 4_1        | 4,93                    |
|                                                                            |            |         |  | 4_2        | 5,89                    |
|                                                                            |            |         |  | 4_3        | 4,42                    |
|                                                                            |            |         |  | 4_4        | 5,49                    |
|                                                                            |            |         |  | 4_5        | 5,67                    |
|                                                                            |            |         |  | 5_1        | 5,54                    |
|                                                                            |            |         |  | 5_2        | 4,98                    |
|                                                                            |            |         |  | 5_3        | 10,58                   |
|                                                                            |            |         |  | 5_4        | 8,03                    |
|                                                                            |            |         |  | 5_5        | 5,47                    |
|                                                                            |            |         |  | 6_1        | 5,91                    |
|                                                                            |            |         |  | 6_2        | 5,09                    |
|                                                                            |            |         |  | 6_3        | 6,29                    |
|                                                                            |            |         |  | 6_4        | 5,26                    |
|                                                                            |            |         |  | 6_5        | 5,68                    |
|                                                                            |            |         |  |            |                         |
| average                                                                    |            | 22,15   |  |            | 6,46                    |
| sd                                                                         |            | 2,51    |  |            | 1,79                    |
|                                                                            |            |         |  |            |                         |
|                                                                            |            |         |  |            |                         |
|                                                                            |            |         |  |            |                         |
| Each datum arise from an independent assay reaction                        |            |         |  |            |                         |

| NADPH:DCPIP oxidoreductase activity (U/mg) of <i>E. coli</i> crude extracts |            |                |  |            |                                         |
|-----------------------------------------------------------------------------|------------|----------------|--|------------|-----------------------------------------|
|                                                                             |            |                |  |            |                                         |
|                                                                             | replicates | <b>BW25113</b> |  | replicates | <b>BW25113-<math>\Delta</math>wrb A</b> |
|                                                                             | 1_1        | 2,27           |  | 1_1        | 1,49                                    |
|                                                                             | 1_2        | 2,62           |  | 1_2        | 2,38                                    |
|                                                                             | 1_3        | 3,22           |  | 1_3        | 1,28                                    |
|                                                                             | 2_1        | 3,12           |  | 2_1        | 2,05                                    |
|                                                                             | 2_2        | 5,54           |  | 2_2        | 2,01                                    |
|                                                                             | 3_1        | 2,86           |  | 3_1        | 0,08                                    |
|                                                                             | 3_2        | 3,33           |  | 3_2        | 1,43                                    |
|                                                                             | 3_3        | 4,23           |  | 3_3        | 1,59                                    |
|                                                                             | 3_4        | 3,00           |  | 4_1        | 2,17                                    |
|                                                                             |            |                |  | 4_2        | 2,53                                    |
|                                                                             |            |                |  | 4_3        | 2,04                                    |
|                                                                             |            |                |  | 4_4        | 1,95                                    |
|                                                                             |            |                |  | 5_1        | 1,60                                    |
|                                                                             |            |                |  | 5_2        | 1,22                                    |
|                                                                             |            |                |  | 5_3        | 1,52                                    |
|                                                                             |            |                |  | 5_4        | 1,17                                    |
|                                                                             |            |                |  | 6_1        | 1,57                                    |
|                                                                             |            |                |  | 6_2        | 1,55                                    |
|                                                                             |            |                |  | 6_3        | 1,57                                    |
|                                                                             |            |                |  | 6_4        | 1,92                                    |
|                                                                             |            |                |  |            |                                         |
|                                                                             |            |                |  |            |                                         |
|                                                                             |            |                |  |            |                                         |
|                                                                             |            |                |  |            |                                         |
|                                                                             |            |                |  |            |                                         |
|                                                                             |            |                |  |            |                                         |
|                                                                             |            |                |  |            |                                         |
| average                                                                     |            | 3,35           |  |            | 1,66                                    |
| sd                                                                          |            | 0,98           |  |            | 0,53                                    |
